# Supplementary material
Source: PubMed Central journal article supplement (PMC3607818)
Supplement: mmc1.pdf [file mmc1.pdf]

# THE LANCET

## **Supplementary appendix**

This appendix formed part of the original submission and has been peer reviewed. We post it as supplied by the authors.

Supplement to: Simmons RK, Echouffo-Tcheugui JB, Sharp SJ, et al. Screening for type 2 diabetes and population mortality over 10 years (ADDITION-Cambridge): a cluster-randomised controlled trial. *Lancet* 2012; published online Oct 4. [http://dx.doi.org/10.1016/S0140-6736\(12\)61422-6](http://dx.doi.org/10.1016/S0140-6736(12)61422-6).

## Web appendix

**Table One: Intervention delivery, treatment recommendations and targets in the intensive treatment group of the *ADDITION-Cambridge* trial**

|                              |                                                                                                                                                                                                                                                                                                                                                                                                                                                                                                                                                                                                                                                                                                                                                                                        |                                                                                |                                                              |                                                                                                  |                                                                                                   |
|------------------------------|----------------------------------------------------------------------------------------------------------------------------------------------------------------------------------------------------------------------------------------------------------------------------------------------------------------------------------------------------------------------------------------------------------------------------------------------------------------------------------------------------------------------------------------------------------------------------------------------------------------------------------------------------------------------------------------------------------------------------------------------------------------------------------------|--------------------------------------------------------------------------------|--------------------------------------------------------------|--------------------------------------------------------------------------------------------------|---------------------------------------------------------------------------------------------------|
| <b>Intervention delivery</b> | <ul style="list-style-type: none"> <li>▪ Small financial incentives for practices to facilitate more frequent contact between patients and practitioners.</li> <li>▪ Recommendation to the GPs to refer all newly diagnosed patients to a dietician.</li> <li>▪ Practice-based educational meeting with GPs and nurses to discuss treatment targets, algorithms, patient materials and presentation of the evidence underpinning intensive treatment.</li> <li>▪ Interactive practice-based audit and feedback sessions up to twice per year.</li> <li>▪ Provision of glucometers for patients and any necessary training in their use for practitioners.</li> <li>▪ Practice staff were provided with theory-based educational materials to give to patients at diagnosis.</li> </ul> |                                                                                |                                                              |                                                                                                  |                                                                                                   |
|                              | <b>Treatment Target</b>                                                                                                                                                                                                                                                                                                                                                                                                                                                                                                                                                                                                                                                                                                                                                                | <b>Baseline</b>                                                                | <b>Treatment review</b>                                      | <b>Treatment review</b>                                                                          | <b>Treatment review</b>                                                                           |
| <b>HbA<sub>1c</sub></b>      | <7.0%                                                                                                                                                                                                                                                                                                                                                                                                                                                                                                                                                                                                                                                                                                                                                                                  | Dietary advice                                                                 | If HbA <sub>1c</sub> >6.5%, prescribe metformin              | If HbA <sub>1c</sub> >6.5%, increase metformin dose / add a second medication (PGR or SU or TZD) | If HbA <sub>1c</sub> >6.5%, add a third medication (PGR or SU or TZD) and consider adding insulin |
| <b>Blood Pressure</b>        | ≤135/85 mmHg                                                                                                                                                                                                                                                                                                                                                                                                                                                                                                                                                                                                                                                                                                                                                                           | If BP >120/80mmHg or CVD+, prescribe an ACE inhibitor titrated to maximum dose | If BP >135/85 mmHg, add a thiazide diuretic or Ca antagonist | If BP >135/85 mmHg, add a thiazide diuretic or Ca antagonist                                     | If BP >135/85mmHg, add a β blocker or α blocker                                                   |
| <b>Cholesterol †IHD-</b>     | <5.0 mmol/l                                                                                                                                                                                                                                                                                                                                                                                                                                                                                                                                                                                                                                                                                                                                                                            | If TC ≥3.5 mmol/l, dietary advice and prescribe statin                         | If TC >5.0mmol/l, increase statin dose up to maximum         | If TC >5.0mmol/l, increase statin dose up to maximum                                             | Consider adding a fibrate if TC >5.0mmol/l                                                        |
| <b>Cholesterol IHD+</b>      | <4.5 mmol/l                                                                                                                                                                                                                                                                                                                                                                                                                                                                                                                                                                                                                                                                                                                                                                            | If TC ≥3.5 mmol/, dietary advice and prescribe statin                          | If TC >4.5mmol/l, increase statin dose up to maximum         | If TC >4.5mmol/l, increase statin dose up to maximum                                             | Consider adding a fibrate if TC >4.5mmol/l                                                        |
| <b>Acetylsalicylic acid</b>  | 75mg of aspirin daily to all patients without specific contraindications                                                                                                                                                                                                                                                                                                                                                                                                                                                                                                                                                                                                                                                                                                               |                                                                                |                                                              |                                                                                                  |                                                                                                   |

SU = sulphonylurea, PGR = prandial glucose regulator, ACE = angiotensin converting enzyme, TZD = thiazolidinedione, K+: potassium, Ca: calcium, IHD- = no history of ischaemic heart disease, IHD+ = history of ischaemic heart disease, CVD+ = previous cardiovascular event or presence of cardiovascular risk factor other than diabetes, BP = blood pressure, TC = total cholesterol
